# Supplementary material for: Discovery of the Potentiator of the Pore-Forming Ability of Lantibiotic Nisin: Perspectives for Anticancer Therapy
Source: MDPI journal article supplement (doi:10.3390/membranes12111166), 2022-11-20

# Supplementary Material: Discovery of the Potentiator of the Pore-Forming Ability of Lantibiotic Nisin: Perspectives for Anticancer Therapy

Dayana N. Chernyshova, Alexander A. Tyulin, Olga S. Ostroumova and Svetlana S. Efimova \*

Laboratory of Membrane and Ion Channel Modeling, Department of Molecular Physiology of the Cell, Institute of Cytology of Russian Academy of Sciences, Tikhoretsky 4, 194064 Saint Petersburg, Russia

\* Correspondence: efimova@incras.ru

**Citation:** Chernyshova, D.N.; Tyulin, A.A.; Ostroumova, O.S.; Efimova, S.S. Discovery of the Potentiator of the Pore-Forming Ability of Lantibiotic Nisin: Perspectives for Anticancer Therapy. *Membranes* **2022**, *12*, 1166. <https://doi.org/10.3390/membranes12111166>

Academic Editor: Annarosa Arcangeli

Received: 7 October 2022

Accepted: 17 November 2022

Published: 20 November 2022

**Publisher's Note:** MDPI stays neutral with regard to jurisdictional claims in published maps and institutional affiliations.

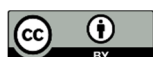

**Copyright:** © 2022 by the authors. Licensee MDPI, Basel, Switzerland. This article is an open access article distributed under the terms and conditions of the Creative Commons Attribution (CC BY) license (<https://creativecommons.org/licenses/by/4.0/>).

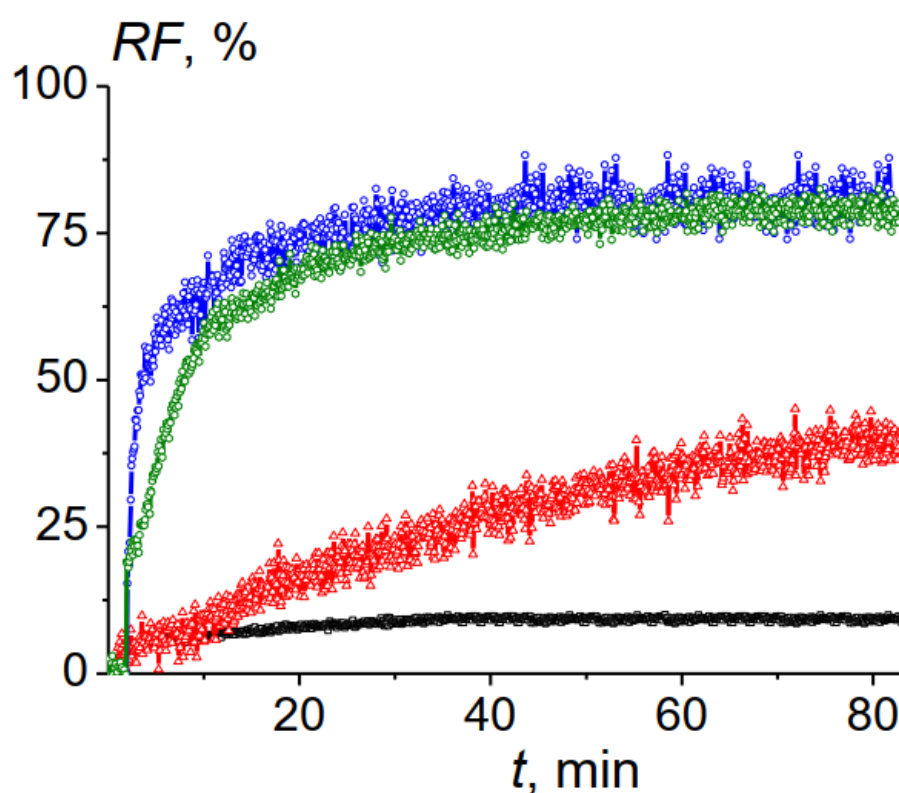

**Figure S1.** The dependence of relative fluorescence of calcein (*RF*) leaked from vesicles composed of DOPC (*black curve*), DOPC/DOPS (50/50 mol%) (*red curve*), DOPC/DOPG (50/50 mol%) (*green curve*) and DOPC/TOCL (50/50 mol%) (*blue curve*) on time (*t*). The lantibiotic was added into the liposomal suspension up to 0.1 mM at the zero time point.

**Table S1.** The parameters of exponential function fitting the time dependence of nisin-induced calcein leakage from liposomes of different phospholipid composition.

| <i>lipid composition<br/>of vesicles</i> | <i>RFmax, %</i> | <i>t0, min*</i> | <i>t1, min**</i> | <i>t2, min**</i> |
|------------------------------------------|-----------------|-----------------|------------------|------------------|
| DOPC                                     | 9 ± 3           | 10 ± 1          |                  |                  |
| DOPC/DOPS<br>(50/50 mol%)                | 39 ± 3          | 58 ± 2          |                  |                  |
| DOPC/DOPG<br>(50/50 mol%)                | 82 ± 2          | -               | 0.8 ± 0.3        | 12 ± 2           |
| DOPC/TOCL<br>(50/50 mol%)                | 81 ± 2          | -               | 4.8 ± 0.5        | 24 ± 2           |

According to the value of the  $\chi^2$ -test, single(\*)- or double(\*\*)-exponential function was used to fit the time dependence of relative fluorescence of calcein leaked from vesicles with constants  $t_0$  or  $t_1$  and  $t_2$  respectively.

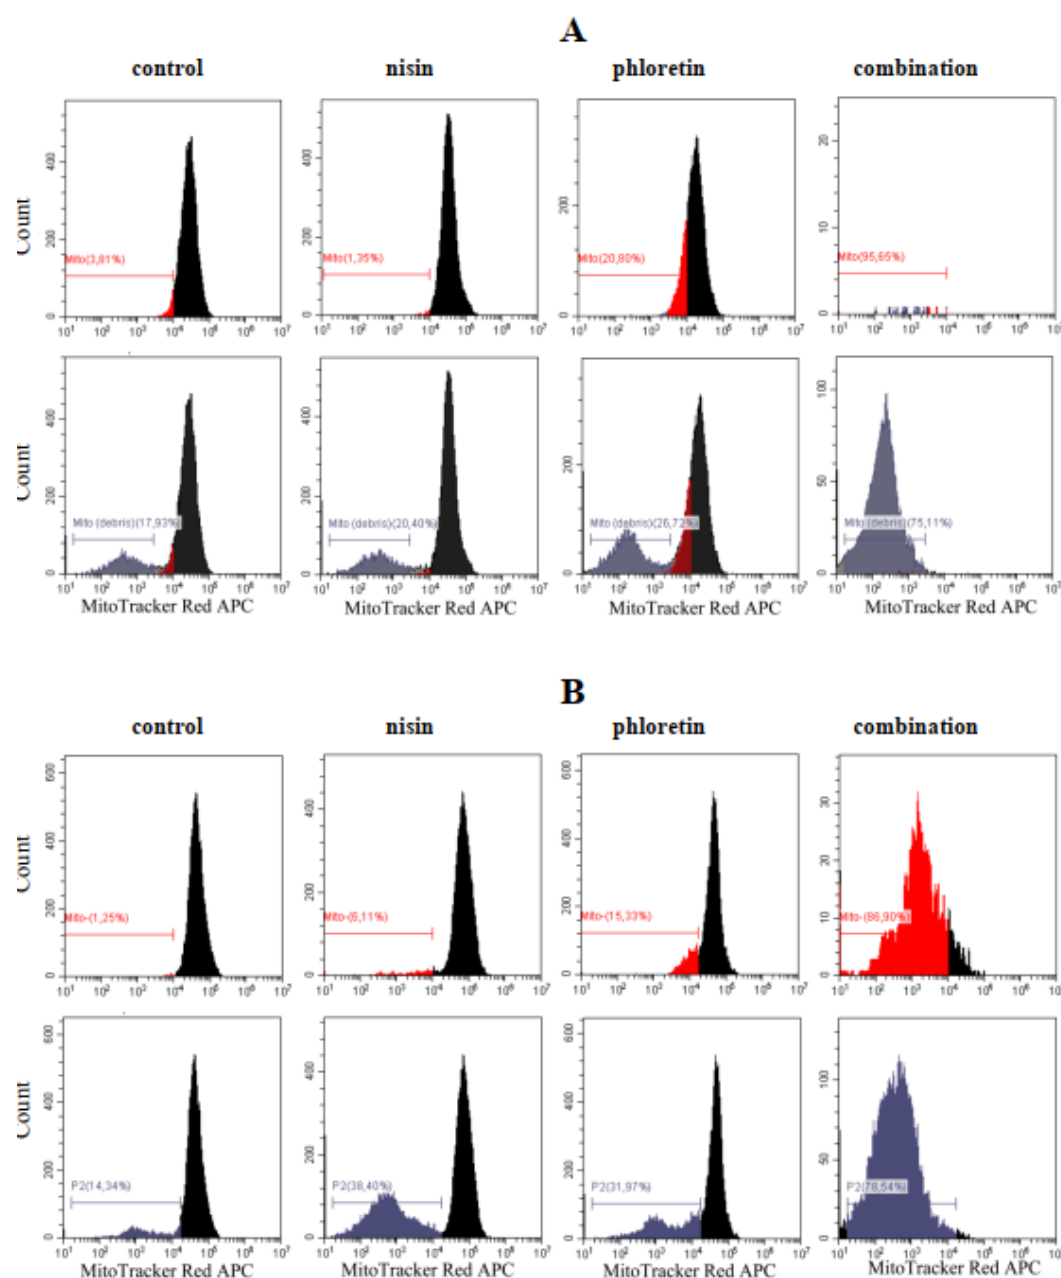

Supplement: s1 [file s1]
